# Supplementary material for: Identification of a 15-pseudogene based prognostic signature for predicting survival and antitumor immune response in breast cancer
Source: PubMed Central journal article supplement (PMC8202842; doi:10.18632/aging.103735), 2020-12-16
Supplement: aging-13-103735-s001.pdf [file aging-13-103735-s001.pdf]

**SUPPLEMENTARY FIGURES**

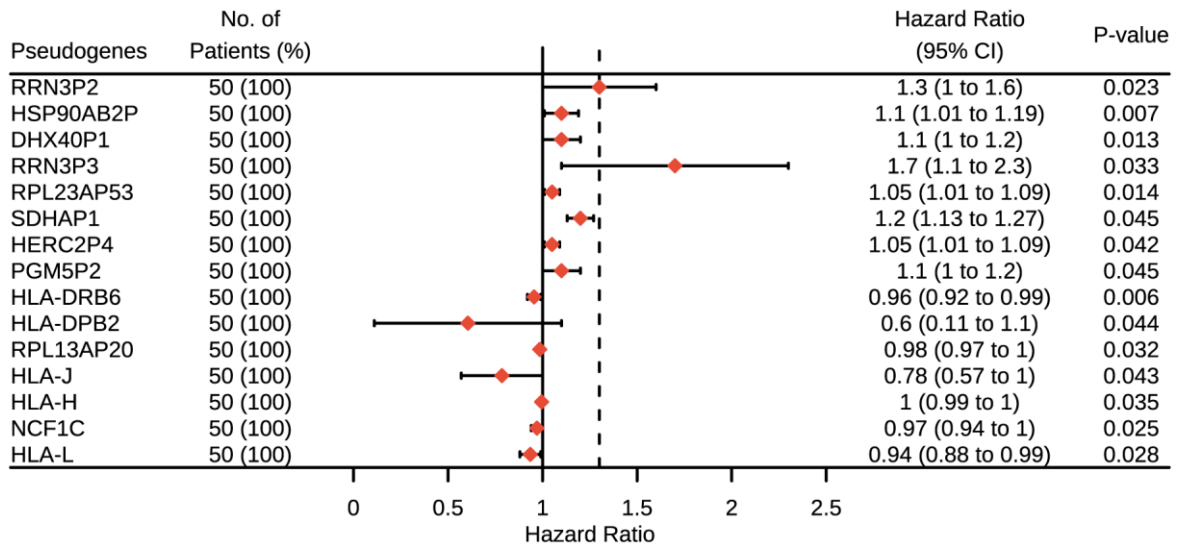

**Supplementary Figure 1. Validation of the 15 prognostic pseudogenes in EGA dataset.** The hazard ratios (HR), 95% confidence intervals (CI) calculated by univariate Cox proportional hazard regression of the 15 prognostic pseudogenes in EGA dataset.

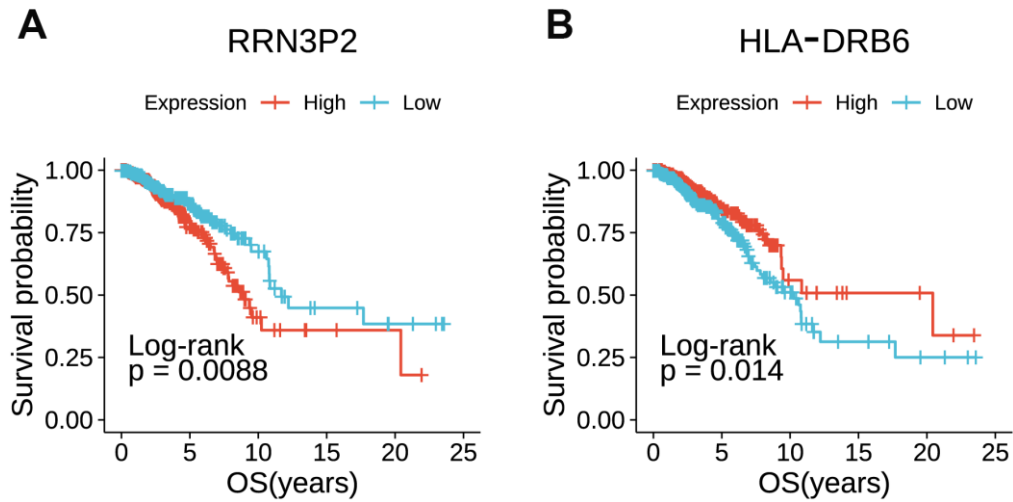

**Supplementary Figure 2.** Correlation between the expression levels of RRN3P2 (A) and HLA-DRB6 (B) and overall survival in patients with breast cancer from TCGA dataset.

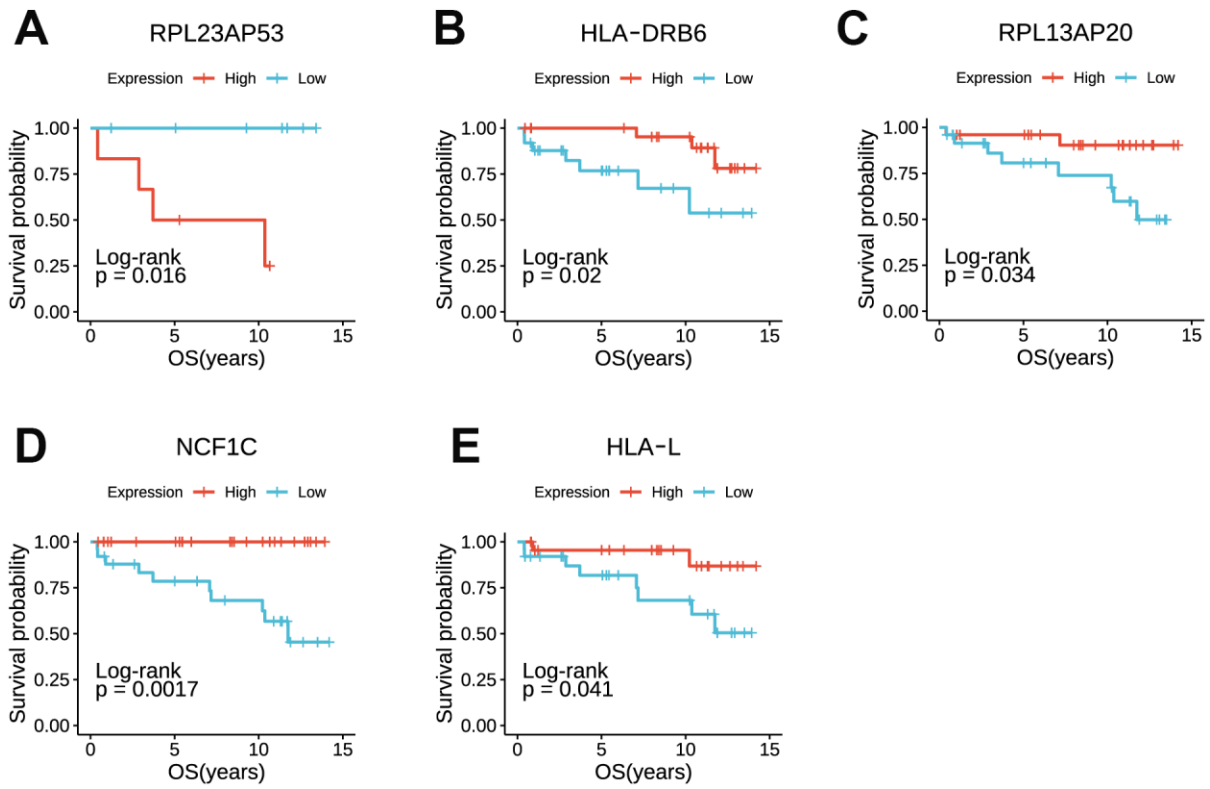

**Supplementary Figure 3.** Correlation between the expression levels of RPL23AP53 (A), HLA-DRB6 (B), RPL13AP20 (C), NCF1C (D) and HLA-L (E) and overall survival in patients with breast cancer from EGA dataset.
