# Supplementary material for: Identification of a 15-pseudogene based prognostic signature for predicting survival and antitumor immune response in breast cancer
Source: PubMed Central journal article supplement (PMC8202842; doi:10.18632/aging.103735), 2020-12-16
Supplement: aging-13-103735-s002.pdf [file aging-13-103735-s002.pdf]

## SUPPLEMENTARY TABLES

**Supplementary Table 1. The coefficients of the 15 prognostic pseudogenes by LASSO.**

| <b>Pseudogenes</b> | <b>Coefficients</b> |
|--------------------|---------------------|
| NCF1C              | 0.000000000         |
| HLA-DRB6           | -0.002846803        |
| HLA-DRB2           | -0.104956422        |
| HLA-J              | -0.057654172        |
| HLA-H              | 0.000000000         |
| HLA-L              | -0.013823392        |
| RPL13AP20          | -0.001763734        |
| PGM5P2             | 0.000000000         |
| HERC2P4            | 0.000000000         |
| HSP90AB2P          | 0.000000000         |
| DHX40P1            | 0.044932918         |
| RRN3P3             | 0.000000000         |
| RRN3P2             | 0.226104532         |
| SDHAP1             | 0.046539494         |
| RPL23AP53          | 0.021710806         |

**Supplementary Table 2. Clinicopathological features stratified by high-risk and low-risk subgroups.**

| <b>Variable</b>            | <b>High-risk, n (%)</b> | <b>Low-risk, n (%)</b> | <b>P</b> |
|----------------------------|-------------------------|------------------------|----------|
| No. of Patients            | 387(49.94)              | 388(50.06)             | -        |
| Age at diagnosis, years    |                         |                        | 0.603    |
| ≤ 50                       | 116(14.97)              | 124(16.00)             |          |
| > 50                       | 271(34.96)              | 264(34.06)             |          |
| ER status                  |                         |                        | 8e-08    |
| Negative                   | 53(6.84)                | 118(15.23)             |          |
| Positive                   | 311(40.13)              | 257(33.16)             |          |
| Unknown                    | 23(2.97)                | 15(1.68)               |          |
| PR status                  |                         |                        | 6e-04    |
| Negative                   | 97(12.52)               | 145(18.71)             |          |
| Positive                   | 265(34.19)              | 228(29.42)             |          |
| Unknown                    | 25(3.22)                | 15(1.94)               |          |
| HER-2 status               |                         |                        | 0.904    |
| Negative                   | 269(34.71)              | 272(35.10)             |          |
| Positive                   | 65(8.39)                | 67(8.65)               |          |
| Unknown                    | 53(6.84)                | 49(6.32)               |          |
| Molecular subtypes         |                         |                        | 4e-06    |
| Normal-like                | 42(5.42)                | 89(11.48)              |          |
| Luminal A                  | 26(3.35)                | 39(5.03)               |          |
| Luminal B                  | 206(26.58)              | 166(21.42)             |          |
| HER2 positive              | 102(13.16)              | 75(9.68)               |          |
| Basal-like                 | 6(0.77)                 | 16(2.06)               |          |
| Unknown                    | 5(0.64)                 | 3(0.39)                |          |
| T stage                    |                         |                        | 0.688    |
| T1                         | 105(13.55)              | 100(12.90)             |          |
| T2                         | 223(28.77)              | 235(30.32)             |          |
| T3                         | 41(5.29)                | 42(5.42)               |          |
| T4                         | 17(2.19)                | 10(1.29)               |          |
| Unknown                    | 1(0.13)                 | 1(0.13)                |          |
| Lymph node stage           |                         |                        | 0.037    |
| N0                         | 168(21.68)              | 193(24.90)             |          |
| N1                         | 137(17.68)              | 127(16.39)             |          |
| N2                         | 52(6.71)                | 40(5.16)               |          |
| N3                         | 18(2.32)                | 25(3.23)               |          |
| Unknown                    | 12(1.55)                | 3(0.39)                |          |
| Distance metastasis status |                         |                        | 0.248    |
| Negative                   | 347(44.77)              | 354(45.68)             |          |
| Positive                   | 6(0.77)                 | 10(1.29)               |          |
| Unknown                    | 34(4.39)                | 24(3.10)               |          |
| Vital status               |                         |                        | 0.070    |
| Alive                      | 318(41.03)              | 338(43.61)             |          |
| Dead                       | 69(8.90)                | 50(6.45)               |          |

Abbreviations: ER: estrogen receptor; PR: progesterone receptor; HER-2: human epidermal growth receptor-2.

\* Evaluated by Chi-square test.

**Supplementary Table 3. Clinicopathological features stratified by P1 and P2 subgroups.**

| <b>Variable</b>            | <b>P1, n (%)</b> | <b>P2, n (%)</b> | <b>P</b> |
|----------------------------|------------------|------------------|----------|
| No. of Patients            | 362(46.71)       | 413(53.29)       | -        |
| Age at diagnosis, years    |                  |                  | 0.709    |
| ≤ 50                       | 115(14.84)       | 125(16.12)       |          |
| > 50                       | 247(31.87)       | 288(37.16)       |          |
| ER status                  |                  |                  | 0.028    |
| Negative                   | 66(8.52)         | 105(13.55)       |          |
| Positive                   | 275(35.48)       | 293(37.81)       |          |
| Unknown                    | 21(2.71)         | 15(1.94)         |          |
| PR status                  |                  |                  | 0.413    |
| Negative                   | 107(13.81)       | 135(17.42)       |          |
| Positive                   | 233(30.06)       | 260(33.55)       |          |
| Unknown                    | 22(2.84)         | 18(2.32)         |          |
| HER-2 status               |                  |                  | 0.358    |
| Negative                   | 250(32.25)       | 291(37.55)       |          |
| Positive                   | 58(7.48)         | 74(9.55)         |          |
| Unknown                    | 54(6.97)         | 48(6.19)         |          |
| Molecular subtypes         |                  |                  | 0.002    |
| Normal-like                | 47(6.06)         | 84(10.84)        |          |
| Luminal A                  | 26(3.35)         | 39(5.03)         |          |
| Luminal B                  | 180(23.23)       | 192(24.77)       |          |
| HER2 positive              | 95(12.25)        | 82(10.58)        |          |
| Basal-like                 | 7(0.90)          | 15(1.94)         |          |
| Unknown                    | 7(0.90)          | 1(0.13)          |          |
| T stage                    |                  |                  | 0.075    |
| T1                         | 93(12.00)        | 112(14.45)       |          |
| T2                         | 211(27.23)       | 247(31.87)       |          |
| T3                         | 37(4.77)         | 46(5.94)         |          |
| T4                         | 20(2.58)         | 7(0.90)          |          |
| Unknown                    | 1(0.13)          | 1(0.13)          |          |
| Lymph node stage           |                  |                  | 0.047    |
| N0                         | 153(19.74)       | 208(26.84)       |          |
| N1                         | 132(17.03)       | 132(17.03)       |          |
| N2                         | 48(6.19)         | 44(5.68)         |          |
| N3                         | 18(2.32)         | 25(3.23)         |          |
| Unknown                    | 11(1.42)         | 4(0.52)          |          |
| Distance metastasis status |                  |                  | 0.441    |
| Negative                   | 325(41.94)       | 376(48.52)       |          |
| Positive                   | 6(0.77)          | 10(1.29)         |          |
| Unknown                    | 31(4.00)         | 27(3.48)         |          |
| Vital status               |                  |                  | 0.560    |
| Alive                      | 303(39.1)        | 353(45.5)        |          |
| Dead                       | 59(7.61)         | 60(7.74)         |          |

Abbreviations: P1: patient subgroup 1; P2: patient subgroup 2; ER: estrogen receptor; PR: progesterone receptor; HER-2: human epidermal growth receptor-2.

\* Evaluated by Chi-square test.

**Supplementary Table 4. Potential miRNAs binding to the 15 prognostic pseudogenes identified by dreamBase.**

| <b>Pseudogene</b> | <b>miRNA</b>                                                                                                                                                                                                                                                                                                                                                                                                                                                                                                                                                                                                                                                                                                                                                                                                                                                                                                                  |
|-------------------|-------------------------------------------------------------------------------------------------------------------------------------------------------------------------------------------------------------------------------------------------------------------------------------------------------------------------------------------------------------------------------------------------------------------------------------------------------------------------------------------------------------------------------------------------------------------------------------------------------------------------------------------------------------------------------------------------------------------------------------------------------------------------------------------------------------------------------------------------------------------------------------------------------------------------------|
| <b>NCF1C</b>      | 0                                                                                                                                                                                                                                                                                                                                                                                                                                                                                                                                                                                                                                                                                                                                                                                                                                                                                                                             |
| <b>HLA-DRB6</b>   | 0                                                                                                                                                                                                                                                                                                                                                                                                                                                                                                                                                                                                                                                                                                                                                                                                                                                                                                                             |
| <b>HLA-DRB2</b>   | 0                                                                                                                                                                                                                                                                                                                                                                                                                                                                                                                                                                                                                                                                                                                                                                                                                                                                                                                             |
| <b>HLA-J</b>      | hsa-miR-1193; hsa-miR-140-3p; hsa-miR-15a-5p; hsa-miR-15b-5p; hsa-miR-16-5p;<br>hsa-miR-195-5p; hsa-miR-214-3p; hsa-miR-2278; hsa-miR-3619-5p; hsa-miR-3918;<br>hsa-miR-424-5p; hsa-miR-4428; hsa-miR-4726-5p; hsa-miR-497-5p; hsa-miR-589-5p;<br>hsa-miR-6838-5p; hsa-miR-761                                                                                                                                                                                                                                                                                                                                                                                                                                                                                                                                                                                                                                                |
| <b>HLA-H</b>      | hsa-miR-124-3p; hsa-miR-125a-5p; hsa-miR-125b-5p; hsa-miR-1343-3p; hsa-miR-140-3p; hsa-miR-<br>143-3p; hsa-miR-15a-5p; hsa-miR-15b-5p; hsa-miR-16-5p; hsa-miR-195-5p;<br>hsa-miR-214-3p; hsa-miR-22-3p; hsa-miR-2278; hsa-miR-296-5p; hsa-miR-3127-5p;<br>hsa-miR-3184-5p; hsa-miR-3200-5p; hsa-miR-323a-3p; hsa-miR-323b-3p; hsa-miR-3605-3p; hsa-<br>miR-3619-5p; hsa-miR-362-5p; hsa-miR-380-3p; hsa-miR-3918; hsa-miR-423-5p;<br>hsa-miR-424-5p; hsa-miR-4319; hsa-miR-4640-5p; hsa-miR-4726-5p; hsa-miR-4770;<br>hsa-miR-497-5p; hsa-miR-500b-5p; hsa-miR-506-3p; hsa-miR-514a-5p; hsa-miR-532-3p; hsa-miR-<br>605-3p; hsa-miR-6088; hsa-miR-665; hsa-miR-6746-3p; hsa-miR-6783-3p;<br>hsa-miR-6838-5p; hsa-miR-744-5p; hsa-miR-761; hsa-miR-766-5p                                                                                                                                                                      |
| <b>HLA-L</b>      | hsa-miR-140-3p; hsa-miR-15a-5p; hsa-miR-15b-5p; hsa-miR-16-5p; hsa-miR-195-5p;<br>hsa-miR-214-3p; hsa-miR-2278; hsa-miR-296-5p; hsa-miR-3127-5p; hsa-miR-335-5p;<br>hsa-miR-3619-5p; hsa-miR-370-3p; hsa-miR-380-3p; hsa-miR-3918; hsa-miR-424-5p;<br>hsa-miR-4428; hsa-miR-4726-5p; hsa-miR-497-5p; hsa-miR-500b-5p; hsa-miR-6838-5p;<br>hsa-miR-6893-3p; hsa-miR-761                                                                                                                                                                                                                                                                                                                                                                                                                                                                                                                                                        |
| <b>RPL13AP20</b>  | hsa-miR-1224-5p; hsa-miR-193a-5p; hsa-miR-214-3p; hsa-miR-296-3p; hsa-miR-29a-3p; hsa-miR-<br>29b-3p; hsa-miR-29c-3p; hsa-miR-3619-5p; hsa-miR-3681-5p; hsa-miR-409-3p;<br>hsa-miR-452-5p; hsa-miR-4664-3p; hsa-miR-4676-3p; hsa-miR-486-5p; hsa-miR-526b-5p;<br>hsa-miR-532-5p; hsa-miR-6512-3p; hsa-miR-665; hsa-miR-6849-5p; hsa-miR-761;<br>hsa-miR-766-5p; hsa-miR-873-5p; hsa-miR-892c-3p                                                                                                                                                                                                                                                                                                                                                                                                                                                                                                                               |
| <b>PGM5P2</b>     | hsa-miR-328-3p                                                                                                                                                                                                                                                                                                                                                                                                                                                                                                                                                                                                                                                                                                                                                                                                                                                                                                                |
| <b>HERC2P4</b>    | hsa-miR-146a-5p; hsa-miR-146b-5p; hsa-miR-181a-5p; hsa-miR-181b-5p; hsa-miR-181c-5p;<br>hsa-miR-181d-5p; hsa-miR-205-5p; hsa-miR-4262; hsa-miR-7153-5p                                                                                                                                                                                                                                                                                                                                                                                                                                                                                                                                                                                                                                                                                                                                                                        |
| <b>HSP90AB2P</b>  | hsa-miR-124-3p; hsa-miR-1252-5p; hsa-miR-128-3p; hsa-miR-142-5p; hsa-miR-144-5p;<br>hsa-miR-150-5p; hsa-miR-182-5p; hsa-miR-18a-5p; hsa-miR-18b-5p; hsa-miR-205-5p;<br>hsa-miR-2115-3p; hsa-miR-216a-3p; hsa-miR-2682-5p; hsa-miR-29a-3p; hsa-miR-29b-3p; hsa-miR-<br>29c-3p; hsa-miR-3187-3p; hsa-miR-320a; hsa-miR-320b; hsa-miR-320c;<br>hsa-miR-320d; hsa-miR-345-3p; hsa-miR-34b-5p; hsa-miR-365a-3p; hsa-miR-365b-3p;<br>hsa-miR-3681-3p; hsa-miR-376a-3p; hsa-miR-376b-3p; hsa-miR-376c-3p; hsa-miR-380-3p; hsa-<br>miR-423-3p; hsa-miR-4429; hsa-miR-449c-5p; hsa-miR-4735-3p; hsa-miR-4761-5p;<br>hsa-miR-4766-3p; hsa-miR-4766-5p; hsa-miR-488-3p; hsa-miR-494-3p; hsa-miR-496;<br>hsa-miR-506-3p; hsa-miR-514a-5p; hsa-miR-515-5p; hsa-miR-519e-5p; hsa-miR-5590-3p; hsa-miR-<br>577; hsa-miR-616-3p; hsa-miR-670-3p; hsa-miR-670-5p; hsa-miR-766-5p;<br>hsa-miR-874-3p; hsa-miR-9-5p; hsa-miR-942-5p; hsa-miR-944 |
| <b>DHX40P1</b>    | hsa-miR-124-3p; hsa-miR-1271-5p; hsa-miR-1306-5p; hsa-miR-186-5p; hsa-miR-199a-5p; hsa-miR-<br>199b-5p; hsa-miR-22-3p; hsa-miR-30a-5p; hsa-miR-30b-5p; hsa-miR-30c-5p;<br>hsa-miR-30d-5p; hsa-miR-30e-5p; hsa-miR-33a-5p; hsa-miR-33b-5p; hsa-miR-3612;<br>hsa-miR-506-3p; hsa-miR-545-5p; hsa-miR-625-3p; hsa-miR-628-5p; hsa-miR-650;<br>hsa-miR-7151-5p; hsa-miR-96-5p                                                                                                                                                                                                                                                                                                                                                                                                                                                                                                                                                     |
| <b>RRN3P3</b>     | 0                                                                                                                                                                                                                                                                                                                                                                                                                                                                                                                                                                                                                                                                                                                                                                                                                                                                                                                             |
| <b>RRN3P2</b>     | hsa-miR-1297; hsa-miR-132-3p; hsa-miR-191-5p; hsa-miR-212-3p; hsa-miR-224-3p;<br>hsa-miR-26a-5p; hsa-miR-26b-5p; hsa-miR-300; hsa-miR-381-3p; hsa-miR-4465;                                                                                                                                                                                                                                                                                                                                                                                                                                                                                                                                                                                                                                                                                                                                                                   |

**SDHAP1**

hsa-miR-4524a-5p; hsa-miR-4524b-5p; hsa-miR-522-3p; hsa-miR-532-5p  
hsa-let-7a-5p; hsa-let-7b-5p; hsa-let-7c-5p; hsa-let-7d-5p; hsa-let-7e-5p; hsa-let-7f-5p;  
hsa-let-7g-5p; hsa-let-7i-5p; hsa-miR-105-5p; hsa-miR-1249-3p; hsa-miR-1301-3p;  
hsa-miR-136-5p; hsa-miR-15a-5p; hsa-miR-15b-5p; hsa-miR-16-5p; hsa-miR-195-5p;  
hsa-miR-216a-5p; hsa-miR-2355-5p; hsa-miR-2681-3p; hsa-miR-3150a-3p; hsa-miR-3529-5p; hsa-  
miR-361-3p; hsa-miR-3622b-5p; hsa-miR-379-5p; hsa-miR-424-5p; hsa-miR-4458;  
hsa-miR-4500; hsa-miR-4731-5p; hsa-miR-4761-3p; hsa-miR-485-5p; hsa-miR-491-5p;  
hsa-miR-495-3p; hsa-miR-497-5p; hsa-miR-5047; hsa-miR-505-3p; hsa-miR-516b-5p;  
hsa-miR-542-3p; hsa-miR-543; hsa-miR-545-3p; hsa-miR-5688; hsa-miR-5691;  
hsa-miR-6763-5p; hsa-miR-6805-3p; hsa-miR-6838-5p; hsa-miR-6884-5p; hsa-miR-7853-5p; hsa-  
miR-98-5p

**RPL23AP53**

hsa-miR-1343-3p; hsa-miR-141-3p; hsa-miR-200a-3p; hsa-miR-214-5p; hsa-miR-28-5p;  
hsa-miR-3139; hsa-miR-376a-3p; hsa-miR-376b-3p; hsa-miR-6783-3p; hsa-miR-708-5p

---

**Supplementary Table 5. miRNA targeted genes correlated with their pseudogenes at  $|r| \geq 0.3$  and  $P < 0.05$ .**

| <b>Pseudogene</b> | <b>miRNA targeted genes</b>                                                                                                 |
|-------------------|-----------------------------------------------------------------------------------------------------------------------------|
| <b>NCF1C</b>      | 0                                                                                                                           |
| <b>HLA-DRB6</b>   | 0                                                                                                                           |
| <b>HLA-DRB2</b>   | 0                                                                                                                           |
| <b>HLA-J</b>      | CCL5                                                                                                                        |
| <b>HLA-H</b>      | CD274; BAK1; CD38; CXCL10; CCL4; CCL5; COTL1                                                                                |
| <b>HLA-L</b>      | CD38; CXCL10; CCL4; CCL5; CD274                                                                                             |
| <b>RPL13AP20</b>  | BAX; GSK3B; IFNAR1; GSK3B; MGMT; CDK3                                                                                       |
| <b>PGM5P2</b>     | 0                                                                                                                           |
| <b>HERC2P4</b>    | 0                                                                                                                           |
| <b>HSP90AB2P</b>  | AR; BCL2L11; CCNT2; CLOCK; CNOT6; CPEB3; CPEB4; CREB1; DICER1; ERBB3; ESR1; FOXP1; GSK3B                                    |
| <b>DHX40P1</b>    | CLOCK; ATF6; CDH1; CLTC                                                                                                     |
| <b>RRN3P3</b>     | 0                                                                                                                           |
| <b>RRN3P2</b>     | ATM; CHD1; CPEB4; CRK; GSK3B; IRAK4; KLHL11; LARP1; MAP3K2; MTDH; NR2C2; PIK3C2A; PTPN13; RASA1; RB1; RB1CC1; RCBTB1; ROCK1 |
| <b>SDHAP1</b>     | MPL; DMTF1; MBD1; MPL                                                                                                       |
| <b>RPL23AP53</b>  | KLF12; KLHL20; ATRX; MPL                                                                                                    |
